# Supplementary material
Source: HighWire-hosted journal article supplement (https://cmajopen.ca/highwire/filestream/81259/field_highwire_adjunct_files/2/2018-0097-3-at.pdf)
Supplement: 2018-0097-3-at.pdf [file 2018-0097-3-at.pdf]

**Appendix 3** (as supplied by the authors): Healthcare utilization and costs

Table A1: Healthcare utilization in the last 6-months of life stratified by chronic condition

| Decedents             | Fiscal Year | Hospital Admission % | ICU Admission % | ED Visits % | Saw ≥ 10 Different Physicians % | Mechanical Ventilation % |
|-----------------------|-------------|----------------------|-----------------|-------------|---------------------------------|--------------------------|
| Cancer<br>(n=195,560) | <b>All</b>  | <b>91.9</b>          | <b>13.6</b>     | <b>89.7</b> | <b>76.6</b>                     | <b>8.0</b>               |
|                       | 2004        | 93.2                 | 13.3            | 88.0        | 68.7                            | 7.1                      |
|                       | 2005        | 92.7                 | 13.4            | 88.1        | 69.2                            | 7.6                      |
|                       | 2006        | 92.3                 | 13.2            | 88.8        | 72.1                            | 7.3                      |
|                       | 2007        | 92.2                 | 13.4            | 89.2        | 74.9                            | 7.8                      |
|                       | 2008        | 91.8                 | 13.1            | 89.4        | 76.4                            | 7.9                      |
|                       | 2009        | 92.1                 | 13.2            | 89.5        | 77.3                            | 8.0                      |
|                       | 2010        | 91.7                 | 13.6            | 90.1        | 79.0                            | 8.0                      |
|                       | 2011        | 91.5                 | 13.8            | 90.2        | 79.4                            | 8.3                      |
|                       | 2012        | 91.2                 | 14.4            | 90.8        | 79.8                            | 8.7                      |
|                       | 2013        | 91.1                 | 14.5            | 91.4        | 81.4                            | 8.5                      |
|                       | 2014        | 91.1                 | 13.6            | 91.2        | 82.3                            | 8.5                      |
| COPD (n=48,755)       | <b>All</b>  | <b>83.2</b>          | <b>29.9</b>     | <b>87.9</b> | <b>59.6</b>                     | <b>24.6</b>              |
|                       | 2004        | 87.3                 | 29.6            | 89.7        | 51.2                            | 21.5                     |
|                       | 2005        | 85.9                 | 28.9            | 89.3        | 51.4                            | 21.0                     |
|                       | 2006        | 84.8                 | 29.1            | 88.9        | 57.0                            | 23.8                     |
|                       | 2007        | 83.7                 | 29.7            | 88.3        | 59.6                            | 24.6                     |
|                       | 2008        | 82.7                 | 28.4            | 87.2        | 58.1                            | 24.5                     |
|                       | 2009        | 81.9                 | 29.1            | 87.3        | 59.3                            | 23.9                     |
|                       | 2010        | 82.3                 | 30.2            | 87.6        | 62.2                            | 24.6                     |
|                       | 2011        | 82.8                 | 30.3            | 87.9        | 62.7                            | 25.5                     |
|                       | 2012        | 82.0                 | 29.7            | 87.6        | 62.3                            | 24.7                     |
|                       | 2013        | 82.3                 | 31.7            | 87.1        | 64.0                            | 26.8                     |
|                       | 2014        | 81.5                 | 31.1            | 87.1        | 63.2                            | 27.6                     |
| CAD (n=45,400)        | <b>All</b>  | <b>75.1</b>          | <b>38.2</b>     | <b>82.1</b> | <b>58.6</b>                     | <b>27.2</b>              |
|                       | 2004        | 83.2                 | 42.8            | 86.5        | 54.3                            | 25.4                     |
|                       | 2005        | 81.7                 | 40.6            | 86.0        | 54.6                            | 26.9                     |
|                       | 2006        | 79.5                 | 39.1            | 85.2        | 57.7                            | 26.8                     |
|                       | 2007        | 78.5                 | 38.1            | 84.6        | 59.8                            | 27.4                     |
|                       | 2008        | 75.5                 | 36.3            | 83.1        | 59.7                            | 25.5                     |
|                       | 2009        | 74.8                 | 38.6            | 82.3        | 60.2                            | 27.1                     |
|                       | 2010        | 74.1                 | 36.7            | 82.1        | 60.1                            | 27.7                     |
|                       | 2011        | 72.6                 | 36.5            | 81.4        | 60.3                            | 26.9                     |
|                       | 2012        | 70.1                 | 35.9            | 78.5        | 57.8                            | 26.6                     |
|                       | 2013        | 70.3                 | 39.0            | 78.6        | 59.2                            | 29.0                     |
|                       | 2014        | 68.5                 | 38.1            | 77.1        | 59.2                            | 29.0                     |

| Decedents                       | Fiscal Year   | Hospital admission | ICU admission | ED visits   | Saw ≥ 10 different physicians | Mechanical ventilation |
|---------------------------------|---------------|--------------------|---------------|-------------|-------------------------------|------------------------|
|                                 |               | %                  | %             | %           | %                             | %                      |
| CHF (n=110,337)                 | <b>All</b>    | <b>84.8</b>        | <b>32.2</b>   | <b>88.8</b> | <b>66.3</b>                   | <b>20.5</b>            |
|                                 | 2004          | 88.2               | 34.3          | 90.5        | 56.8                          | 18.4                   |
|                                 | 2005          | 86.3               | 34.0          | 89.9        | 57.1                          | 18.6                   |
|                                 | 2006          | 85.4               | 32.7          | 89.3        | 61.2                          | 19.6                   |
|                                 | 2007          | 84.4               | 32.7          | 88.4        | 64.9                          | 19.5                   |
|                                 | 2008          | 83.7               | 30.7          | 88.4        | 64.8                          | 19.1                   |
|                                 | 2009          | 84.5               | 31.9          | 88.2        | 67.4                          | 20.6                   |
|                                 | 2010          | 83.8               | 30.9          | 88.0        | 68.7                          | 21.0                   |
|                                 | 2011          | 84.1               | 31.9          | 88.5        | 70.4                          | 21.3                   |
|                                 | 2012          | 83.8               | 32.7          | 88.4        | 70.1                          | 21.7                   |
|                                 | 2013          | 84.2               | 31.9          | 88.8        | 72.1                          | 22.5                   |
|                                 | 2014          | 84.6               | 30.9          | 88.8        | 72.9                          | 22.3                   |
|                                 | PVD (n=9,701) | <b>All</b>         | <b>81.7</b>   | <b>39.6</b> | <b>82.5</b>                   | <b>58.4</b>            |
| 2004                            |               | 89.0               | 43.7          | 84.8        | 54.1                          | 30.2                   |
| 2005                            |               | 87.0               | 42.9          | 85.8        | 57.0                          | 30.5                   |
| 2006                            |               | 82.0               | 37.3          | 82.0        | 56.6                          | 30.0                   |
| 2007                            |               | 80.3               | 40.1          | 81.7        | 55.1                          | 31.3                   |
| 2008                            |               | 81.4               | 40.6          | 82.5        | 61.9                          | 33.1                   |
| 2009                            |               | 81.0               | 38.9          | 81.8        | 60.1                          | 33.1                   |
| 2010                            |               | 77.6               | 36.6          | 81.2        | 57.4                          | 31.3                   |
| 2011                            |               | 80.4               | 36.7          | 82.8        | 60.2                          | 31.1                   |
| 2012                            |               | 79.9               | 40.9          | 82.1        | 62.1                          | 35.6                   |
| 2013                            |               | 78.3               | 38.0          | 79.1        | 59.6                          | 32.1                   |
| 2014                            |               | 78.7               | 38.0          | 82.7        | 60.9                          | 31.6                   |
| Severe Liver Disease (n=14,643) |               | <b>All</b>         | <b>93.4</b>   | <b>41.0</b> | <b>94.6</b>                   | <b>77.6</b>            |
|                                 | 2004          | 94.1               | 34.7          | 94.2        | 66.8                          | 25.3                   |
|                                 | 2005          | 94.2               | 38.9          | 94.0        | 67.5                          | 27.7                   |
|                                 | 2006          | 94.5               | 40.1          | 94.7        | 73.3                          | 28.9                   |
|                                 | 2007          | 93.2               | 36.9          | 93.3        | 76.0                          | 27.2                   |
|                                 | 2008          | 92.1               | 37.2          | 94.1        | 76.4                          | 27.7                   |
|                                 | 2009          | 91.9               | 38.9          | 93.8        | 76.3                          | 29.8                   |
|                                 | 2010          | 93.8               | 39.9          | 95.2        | 79.2                          | 30.2                   |
|                                 | 2011          | 94.0               | 42.0          | 95.8        | 81.3                          | 33.4                   |
|                                 | 2012          | 92.4               | 43.5          | 93.8        | 80.9                          | 31.9                   |
|                                 | 2013          | 93.9               | 47.1          | 95.0        | 84.4                          | 34.7                   |
|                                 | 2014          | 93.9               | 47.6          | 95.6        | 85.1                          | 35.5                   |

| Decedents                                 | Fiscal Year | Hospital admission % | ICU admission % | ED visits % | Saw ≥ 10 different physicians % | Mechanical ventilation % |
|-------------------------------------------|-------------|----------------------|-----------------|-------------|---------------------------------|--------------------------|
| Diabetes (with end-organ failure (n=745)) | <b>All</b>  | <b>72.3</b>          | <b>27.7</b>     | <b>81.1</b> | <b>66.4</b>                     | <b>22.1</b>              |
|                                           | 2004        | 92.9                 | 32.1            | 85.7        | 67.9                            | 25.0                     |
|                                           | 2005        | 76.7                 | 30.0            | 93.3        | 53.3                            | *                        |
|                                           | 2006        | 76.9                 | 36.9            | 80.0        | 63.1                            | 24.6                     |
|                                           | 2007        | 74.0                 | 20.6            | 82.2        | 63.0                            | 13.7                     |
|                                           | 2008        | 71.2                 | 17.8            | 82.2        | 76.7                            | 16.4                     |
|                                           | 2009        | 73.5                 | 33.8            | 80.9        | 67.7                            | 27.9                     |
|                                           | 2010        | 64.5                 | 25.8            | 74.2        | 59.7                            | 25.8                     |
|                                           | 2011        | 71.1                 | 24.1            | 75.9        | 63.9                            | 20.5                     |
|                                           | 2012        | 71.6                 | 31.1            | 85.1        | 66.2                            | 32.4                     |
|                                           | 2013        | 69.6                 | 28.3            | 79.4        | 67.4                            | 23.9                     |
|                                           | 2014        | 70.4                 | 28.9            | 82.5        | 72.2                            | 22.7                     |
| Renal Failure (n=29,199)                  | <b>All</b>  | <b>85.3</b>          | <b>30.3</b>     | <b>87.8</b> | <b>72.3</b>                     | <b>20.3</b>              |
|                                           | 2004        | 91.6                 | 35.6            | 90.0        | 72.3                            | 22.4                     |
|                                           | 2005        | 90.0                 | 33.4            | 89.4        | 72.1                            | 21.3                     |
|                                           | 2006        | 88.2                 | 31.4            | 89.8        | 73.5                            | 20.5                     |
|                                           | 2007        | 87.4                 | 33.2            | 89.1        | 74.9                            | 22.3                     |
|                                           | 2008        | 86.2                 | 30.4            | 88.0        | 75.1                            | 21.6                     |
|                                           | 2009        | 80.0                 | 27.7            | 85.0        | 70.1                            | 18.9                     |
|                                           | 2010        | 80.9                 | 26.7            | 86.3        | 69.1                            | 18.8                     |
|                                           | 2011        | 81.3                 | 27.3            | 86.2        | 72.0                            | 18.2                     |
|                                           | 2012        | 80.5                 | 27.3            | 85.2        | 69.1                            | 18.5                     |
|                                           | 2013        | 82.2                 | 28.2            | 86.8        | 72.8                            | 20.3                     |
|                                           | 2014        | 81.9                 | 26.9            | 86.7        | 71.6                            | 18.1                     |
| Dementia (n=86,778)                       | <b>All</b>  | <b>63.4</b>          | <b>6.5</b>      | <b>70.9</b> | <b>39.4</b>                     | <b>4.2</b>               |
|                                           | 2004        | 71.9                 | 6.9             | 77.2        | 36.0                            | 4.0                      |
|                                           | 2005        | 67.4                 | 6.2             | 74.7        | 33.5                            | 4.0                      |
|                                           | 2006        | 64.0                 | 6.4             | 72.0        | 35.4                            | 4.0                      |
|                                           | 2007        | 63.9                 | 6.2             | 71.7        | 37.9                            | 3.6                      |
|                                           | 2008        | 62.3                 | 5.7             | 69.7        | 37.7                            | 3.3                      |
|                                           | 2009        | 62.3                 | 6.4             | 69.2        | 39.3                            | 4.4                      |
|                                           | 2010        | 63.8                 | 6.8             | 71.4        | 42.3                            | 4.2                      |
|                                           | 2011        | 62.5                 | 7.1             | 70.4        | 40.6                            | 4.4                      |
|                                           | 2012        | 61.7                 | 6.3             | 69.2        | 40.3                            | 4.4                      |
|                                           | 2013        | 61.9                 | 6.9             | 69.4        | 42.3                            | 4.6                      |
|                                           | 2014        | 61.2                 | 6.6             | 69.4        | 42.4                            | 4.3                      |

\* Data suppressed due to low number of cases (< 6)

COPD- Chronic obstructive pulmonary disease; CAD – Coronary artery disease; CHF- Congestive heart failure; PVD – Peripheral vascular disease; ICU – Intensive Care Unit; ED – Emergency Department

Table A2: Health care costs (adjusted to 2014 Canadian dollars) in the last 6-months of life stratified by site of death

|                                    | All patients<br>N=962,462 | Died in hospital<br>N=433,074 | Died out of hospital<br>N=529,388 |
|------------------------------------|---------------------------|-------------------------------|-----------------------------------|
| Cost Categories                    | Cost (\$)                 |                               |                                   |
| <b>In-patient</b>                  |                           |                               |                                   |
| Mean (SD)                          | 17,521 (32,456)           | 28,387 (41,727)               | 8,631 (17,753)                    |
| Median (IQR)                       | 7,824 (0-21,426)          | 16,284 (7,290-33,216)         | 0 (0-11,060)                      |
| <b>Hospital outpatient clinic</b>  |                           |                               |                                   |
| Mean (SD)                          | 1,294 (2,571)             | 1,841 (3,161)                 | 847 (1,844)                       |
| Median (IQR)                       | 359 (0-1,558)             | 779 (0-2,279)                 | 0 (0-966)                         |
| <b>Same day surgery*</b>           |                           |                               |                                   |
| Mean (SD)                          | 163 (691)                 | 213 (806)                     | 121 (576)                         |
| <b>Emergency department</b>        |                           |                               |                                   |
| Mean (SD)                          | 936 (930)                 | 1,291 (922)                   | 646 (831)                         |
| Median (IQR)                       | 754 (205-1,351)           | 1,061 (697-1,660)             | 412 (0-976)                       |
| <b>Drug cost</b>                   |                           |                               |                                   |
| Mean (SD)                          | 1,542 (2,810)             | 1,492 (2,837)                 | 1,582 (2,786)                     |
| Median (IQR)                       | 980 (311-1,939)           | 896 (298-1,794)               | 1,058 (325-2,054)                 |
| <b>Rehabilitation services*</b>    |                           |                               |                                   |
| Mean (SD)                          | 563 (4,807)               | 662 (5,122)                   | 482 (4,532)                       |
| <b>Complex continuing care*</b>    |                           |                               |                                   |
| Mean (SD)                          | 2,420 (11,575)            | 843 (6,923)                   | 3,710 (14,166)                    |
| <b>Long-term care *</b>            |                           |                               |                                   |
| Mean (SD)                          | 4,215 (8,072)             | 1,879 (5,577)                 | 6,125 (9,215)                     |
| <b>Home care services</b>          |                           |                               |                                   |
| Mean (SD)                          | 2,220 (4,828)             | 2,083 (4,103)                 | 2,332 (5,346)                     |
| Median (IQR)                       | 414 (0-2,334)             | 616 (0-2,382)                 | 0 (0-2,275)                       |
| <b>Physician (fee for service)</b> |                           |                               |                                   |
| Mean (SD)                          | 3,296 (4,950)             | 4,556 (5,593)                 | 2,265 (4,075)                     |
| Median (IQR)                       | 2,108 (832-4,313)         | 3,172 (1,707-5,664)           | 1,233 (485-3,077)                 |
| <b>Total cost</b>                  |                           |                               |                                   |
| Mean (SD)                          | 36,335 (40,369)           | 45,621 (49,090)               | 28,739 (29,379)                   |
| Median (IQR)                       | 26,329 (13,873-45,279)    | 32,291 (18,245-55,308)        | 22,895 (7,636-36,931)             |

\* Median (IQR) costs are 0 for these health sectors
